# Supplementary material for: Nocturnal oxygen saturation profiles of healthy term infants
Source: HighWire-hosted journal article supplement (doi:10.1136/archdischild-2013-305708), 2014-07-25
Supplement: archdischild-2013-305708supp_Complete_SpO2_CF_ReferenceCurves.xlsx [file archdischild-2013-305708supp_Complete_SpO2_CF_ReferenceCurves.xlsx]

## Sheet: Complete SpO2_CDF Nomograms
		Manual Artefact Rejection																							No Manual Artefact Rejection
		All					non-REM/QS					REM/AS					Wake								All					non-REM/QS					REM/AS					Wake
		Min	25th %ile	50th %ile	75th %ile	Max	Min	25th %ile	50th %ile	75th %ile	Max	Min	25th %ile	50th %ile	75th %ile	Max	Min	25th %ile	50th %ile	75th %ile	Max				Min	25th %ile	50th %ile	75th %ile	Max	Min	25th %ile	50th %ile	75th %ile	Max	Min	25th %ile	50th %ile	75th %ile	Max	Min	25th %ile	50th %ile	75th %ile	Max
2 Weeks	80	0	0.0010962	0.017546	0.097551	2.5119	0	0	0	0.001025	1.7194	0	0	0.0008424	0.013725	0.96316	0	0.0035587	0.035815	0.31906	12.116		2 Weeks	80	0.0096546	0.042645	0.14203	0.25813	3.0755	0	0	0.0012253	0.016328	1.7096	0	0.0015837	0.016049	0.051224	0.91901	0.015309	0.16966	0.39885	1.2548	14.307
	81	0	0.0043603	0.040048	0.15533	2.6499	0	0	0	0.001025	2.8145	0	0	0.00098033	0.032248	1.337	0	0.0045976	0.073967	0.48811	12.782			81	0.018237	0.066033	0.15993	0.38035	3.2725	0	0	0.0012253	0.017239	2.7985	0	0.0021666	0.03303	0.063327	1.2757	0.01701	0.24928	0.53261	1.5663	15.082
	82	0	0.015359	0.077225	0.26187	2.7664	0	0	0	0.0078234	3.631	0	0	0.013097	0.060403	1.7486	0	0.0055723	0.13923	0.54836	13.344			82	0.02074	0.097973	0.19395	0.66131	3.5426	0	0	0.0027256	0.033497	3.6103	0	0.015873	0.037643	0.10139	1.6685	0.01701	0.4036	0.60744	2.2356	16.336
	83	0	0.017969	0.12195	0.2991	3.01	0	0	0	0.010138	4.3521	0	0	0.026147	0.08956	2.0754	0	0.0055723	0.26308	0.65715	14.519			83	0.02217	0.15274	0.31067	0.83031	3.8604	0	0	0.0049141	0.04705	4.3273	0	0.032785	0.069395	0.18555	1.9803	0.020412	0.63716	0.95841	2.7146	17.789
	84	0	0.017969	0.17708	0.43681	3.1912	0	0	0	0.037788	4.9049	0	0.00081683	0.034272	0.17479	2.2818	0	0.0055723	0.35642	1.1444	15.392			84	0.039334	0.22784	0.45814	0.94879	4.0565	0	0	0.0049141	0.063992	4.877	0	0.032785	0.082447	0.32484	2.1772	0.048919	0.66447	1.4635	3.4718	18.699
	85	0	0.027663	0.27144	0.62668	3.3223	0	0	0.0013188	0.053125	5.1552	0	0.005039	0.05178	0.24401	2.7659	0	0.0055723	0.54778	1.741	16.015			85	0.040764	0.33238	0.6187	1.1787	4.1964	0	0	0.025304	0.064957	5.1258	0	0.045303	0.13098	0.50373	2.6498	0.069741	0.93162	2.3958	4.0447	19.336
	86	0.0011578	0.072013	0.32904	0.76686	3.4453	0	0	0.0013188	0.075647	5.5619	0	0.018103	0.081152	0.35802	3.5626	0	0.055723	0.62477	2.3092	16.582			86	0.070086	0.45137	0.72037	1.6496	4.4618	0	0	0.044676	0.094084	5.5303	0.0015837	0.069034	0.17909	0.61237	3.449	0.12928	1.0818	2.7973	4.8904	20.008
	87	0.006368	0.12207	0.44813	0.88987	3.6868	0	0	0.0098777	0.1681	5.7363	0	0.02971	0.12946	0.50955	4.3276	0	0.11702	0.81355	2.8377	17.744			87	0.092316	0.50781	0.86154	1.9544	4.9937	0	0.0010255	0.044676	0.16748	5.7036	0.018213	0.10936	0.23033	0.74568	4.253	0.13278	1.484	3.0501	5.5572	21.3
	88	0.0066574	0.15548	0.59662	0.99754	3.8965	0	0	0.016965	0.19227	5.8346	0.012924	0.047725	0.18781	0.70532	5.1498	0.0015975	0.19132	1.0322	3.01	18.751			88	0.098147	0.62275	1.0191	2.1655	5.6381	0	0.0011261	0.04938	0.19156	5.8014	0.036818	0.1227	0.26575	0.84523	5.0697	0.13627	2.1207	3.2339	6.4352	22.34
	89	0.0066574	0.21685	0.77929	1.1227	4.2983	0	0	0.032195	0.26525	6.0402	0.012924	0.09981	0.25302	0.92925	5.9965	0.0021767	0.24828	1.1997	3.1784	19.577			89	0.1171	0.75167	1.2122	2.3255	6.2963	0	0.005316	0.060805	0.26513	6.0058	0.051427	0.15468	0.37308	1.165	5.9263	0.14977	2.35	3.4276	7.4339	23.192
	90	0.0069469	0.29812	0.92648	1.6827	5.1331	0	0	0.042868	0.31336	6.663	0.01357	0.12445	0.34386	1.2703	7.4561	0.0045976	0.44252	1.5113	4.2201	20.141			90	0.14139	0.88393	1.4634	2.6294	7.3346	0	0.014427	0.080666	0.34706	6.6251	0.053355	0.22511	0.51143	1.7036	7.4174	0.19888	2.8037	3.9337	8.2199	23.812
29	91	0.014762	0.42615	1.308	1.8327	6.2975	0	0	0.070408	0.50746	7.2307	0.031018	0.17374	0.62726	1.8303	9.4355	0.0045976	0.74792	1.9604	6.1553	20.935		29	91	0.19872	1.1211	1.7826	2.9493	8.6951	0	0.039926	0.081626	0.55688	7.1895	0.076497	0.31148	0.84603	2.3545	9.4767	0.20133	3.2591	4.6275	9.0294	24.689
	92	0.023446	0.66781	1.7723	2.9516	8.0785	0	0.034275	0.1437	0.70604	9.3538	0.050404	0.30631	1.0119	3.0118	12.175	0.0045976	0.93907	2.8275	7.2484	21.791			92	0.45672	1.4136	2.2653	3.4672	11.01	0.010417	0.055818	0.15597	0.76728	9.3006	0.095782	0.54445	1.3303	3.8014	12.392	0.20624	3.9816	5.5005	10.037	25.582
	93	0.027209	1.1428	2.1455	4.5648	16.917	0	0.098147	0.23762	1.1276	12.325	0.051696	0.61453	1.6954	3.8795	20.479	0.019923	1.3399	3.1655	8.8912	23.293			93	0.78543	2.0445	3.0811	5.1703	18.018	0.024655	0.10868	0.25188	1.3727	12.284	0.10928	0.97628	2.2615	5.1248	21.62	0.20624	4.3191	7.62	11.824	27.01
	94	0.068021	1.9085	3.66	7.736	35.705	0.0010261	0.25671	0.85901	2.5738	32.231	0.10339	1.1909	3.105	7.1566	37.652	0.11341	2.6117	4.335	13.106	25.399			94	1.0109	2.5642	4.6377	9.0497	36.748	0.025641	0.34275	0.95874	2.932	32.276	0.17292	1.958	3.5064	8.8854	38.869	0.32164	4.855	8.2998	15.815	29.311
	95	0.31435	3.5166	6.4254	14.267	63.303	0.16469	0.66647	1.802	8.6435	68.442	0.28627	3.3568	7.6859	16.568	62.84	0.14569	3.8536	7.7532	21.035	34.595			95	1.3572	4.4023	7.6875	15.49	63.908	0.16469	0.72589	1.9536	9.0994	68.442	0.40049	4.6207	9.3046	17.231	63.643	0.329	6.6525	9.6639	24.728	40.129
	96	1.6172	6.8483	16.094	36.019	85.712	0.42312	2.7831	7.0853	31.942	93.628	1.622	11.18	22.762	37.135	85.283	0.16791	5.3549	12.671	31.873	53.744			96	2.7505	8.8053	17.665	36.865	85.874	0.50359	2.8602	7.2751	32.211	93.588	1.7852	12.656	24.114	38.878	85.529	0.35356	9.7757	16.374	35.301	57.516
	97	9.5756	17.659	35.797	62.203	97.11	1.6035	15.3	35.007	62.722	99.194	9.3802	28.441	47.296	66.603	97.128	0.32101	11.181	24.774	45.98	87.748			97	9.9814	19.218	37.87	62.522	97.096	1.6988	15.368	35.097	62.783	99.178	9.5654	29.546	48.505	67.52	97.099	0.51069	14.78	30.246	56.966	88.653
	98	25.602	43.37	66.843	90.614	99.654	10.78	40.492	67.177	91.038	99.862	28.286	54.925	78.886	92.352	99.719	3.6176	27.241	50.97	71.309	98.713			98	25.969	44.18	68.403	90.66	99.609	10.883	40.702	67.199	91.256	99.844	28.595	55.566	79.319	92.599	99.64	3.8032	27.758	54.422	74.28	98.826
	99	38.522	77.45	89.979	97.851	99.987	41.653	77.874	94.553	99.567	100	42.389	84.68	96.172	99.164	100	18.301	48.256	83.845	91.236	99.91			99	38.832	77.644	90.446	97.884	99.984	41.744	77.897	94.645	99.563	100	42.648	85.083	96.209	99.17	99.996	21.591	51.51	85.511	92.55	99.919
	100	100	100	100	100	100	100	100	100	100	100	100	100	100	100	100	100	100	100	100	100			100	100	100	100	100	100	100	100	100	100	100	100	100	100	100	100	100	100	100	100	100
3 Months	80	0	0	0	0.00062106	0.20379	0	0	0	0	0.058129	0	0	0	0.0006061	0.43776	0	0	0	0.0022054	0.043377		3 Months	80	0	0.0035062	0.077515	0.58709	2.5692	0	0	0.00073901	0.039664	0.14912	0	0	0	0.021183	0.6258	0	0.0043646	0.56751	3.3597	13.384
	81	0	0	0.00029964	0.0013418	0.24204	0	0	0	0	0.065313	0	0	0	0.0012944	0.52481	0	0	0	0.0029343	0.051264			81	0	0.0099114	0.17313	0.65435	2.903	0	0	0.00073901	0.039664	0.16946	0	0	0	0.03032	0.66836	0	0.015153	0.83364	4.461	15.272
	82	0	0	0.00030701	0.0015225	0.29184	0	0	0	0	0.06662	0	0	0	0.0020081	0.64835	0	0	0	0.0029343	0.12224			82	0	0.015972	0.30448	0.71666	3.2173	0	0	0.00073901	0.039664	0.17624	0	0	0.0014607	0.088669	0.69827	0	0.062654	2.6753	5.0804	16.995
	83	0	0	0.00038062	0.0036205	0.35251	0	0	0	0	0.079029	0	0	0	0.0020081	0.78432	0	0	0	0.0033884	0.12224			83	0	0.030165	0.41665	0.91636	3.6134	0	0	0.00073901	0.046982	0.18979	0	0	0.0014607	0.089241	0.77669	0	0.1994	3.212	5.6748	18.267
	84	0	0	0.00043988	0.010442	0.40396	0	0	0	0	0.086867	0	0	0	0.0020081	0.90371	0	0	0	0.0035896	0.12224			84	0	0.051579	0.73951	1.0544	3.7841	0	0	0.0019377	0.056651	0.19657	0	0	0.0020243	0.12683	0.89574	0	0.42463	4.6174	6.9915	21.758
	85	0	0.00021458	0.00047475	0.017664	0.47518	0	0	0	0	0.12605	0	0	0	0.0065402	1.033	0	0	0	0.0040146	0.82134			85	0	0.10882	0.88586	1.5005	3.9123	0	0	0.0019377	0.072218	0.20403	0	0	0.0047852	0.127	1.0476	0	0.79668	5.5506	8.0244	29.136
	86	0	0.00029657	0.00089714	0.028926	0.58236	0	0	0	0	0.18876	0	0	0.00075911	0.022905	1.2229	0	0	0	0.0040146	1.2889			86	0	0.17473	0.97611	1.7825	4.2687	0	0	0.0025359	0.099021	0.23339	0	0	0.026499	0.15066	1.243	0	1.2144	6.4024	9.1156	34.31
	87	0	0.00029657	0.00089714	0.039851	0.65985	0	0	0	0.0015322	0.2299	0	0	0.00075911	0.031115	1.3655	0	0	0.0012177	0.005162	2.0025			87	0	0.26482	1.0709	1.8737	4.4442	0	0	0.0059171	0.12143	0.27565	0	0	0.045118	0.15719	1.3842	0	1.8923	7.3102	9.7451	36.223
	88	0	0.00029657	0.00089714	0.044829	0.79274	0	0	0	0.0030644	0.2717	0	0	0.00075911	0.032615	1.6466	0	0	0.0021698	0.005162	2.6856			88	0	0.34631	1.1663	2.0175	4.5864	0	0	0.0096836	0.12805	0.3192	0	0	0.05767	0.21047	1.6921	0	2.4742	7.8678	10.424	37.295
	89	0	0.00037267	0.0071424	0.048416	0.93289	0	0	0	0.010765	0.34159	0	0	0.013355	0.061367	1.9102	0	0	0.0021698	0.0076323	3.4175			89	0.00026824	0.38327	1.2396	2.199	4.9182	0	0.00042256	0.011834	0.14606	0.39462	0	0.002191	0.069204	0.27561	1.9721	0	2.9179	8.0988	11.328	37.97
	90	0	0.00089848	0.015363	0.082862	1.1103	0	0	0	0.014607	0.44282	0	0.00054986	0.018033	0.083294	2.2269	0	0	0.0027971	0.013441	3.9136			90	0.00026824	0.44477	1.3678	2.2823	5.1285	0	0.00069511	0.025503	0.17233	0.52854	0	0.0069748	0.11485	0.32947	2.2948	0	3.4005	8.3718	12.027	39.115
26	91	0	0.0070741	0.028219	0.11439	1.4401	0	0	0	0.017868	0.46634	0	0.010727	0.04373	0.13607	3.0262	0	0	0.0033459	0.047732	5.5298		26	91	0.0026824	0.52844	1.4363	2.5219	5.6152	0	0.00069511	0.057838	0.1866	0.55975	0	0.019977	0.14429	0.40771	3.1544	0	3.8741	10.136	13.451	39.578
	92	0	0.012763	0.065516	0.15503	1.9344	0	0	0.0057266	0.058762	0.55124	0	0.028045	0.0929	0.24642	4.1612	0	0	0.0041956	0.10227	6.1397			92	0.013412	0.60187	1.5199	2.6648	6.3196	0	0.0080118	0.095848	0.22865	0.66376	0	0.043578	0.25881	0.46924	4.3572	0	4.6256	10.839	14.111	40.372
	93	0.0014952	0.023635	0.11127	0.22095	3.0912	0	0	0.012726	0.082253	0.89414	0	0.036065	0.1858	0.35997	6.6344	0	0	0.020421	0.34251	7.9898			93	0.034335	0.80105	1.8679	2.9665	6.9802	0	0.016929	0.13271	0.3079	1.0304	0	0.13933	0.35983	0.65609	6.9015	0	5.6944	11.631	17.022	41.609
	94	0.0047848	0.091808	0.1934	0.38908	7.1403	0	0.004394	0.034023	0.13915	5.3524	0.0014663	0.041736	0.336	0.60634	11.14	0	0.022676	0.13049	0.86529	10.438			94	0.10435	1.1193	2.0789	3.2796	8.7356	0	0.026714	0.22119	0.47503	5.4934	0.029326	0.3001	0.49339	1.016	11.521	0	7.759	12.082	19.138	43.919
	95	0.034197	0.21729	0.5451	1.1048	12.466	0	0.036256	0.091692	0.33633	11.479	0.054253	0.19299	0.55721	1.262	16.71	0	0.36488	0.90188	2.2085	11.653			95	0.24886	1.6752	2.5652	3.7157	14.098	0	0.052481	0.30438	0.7462	11.634	0.13094	0.5365	0.83545	1.9928	17.132	0	9.6713	13.001	19.901	44.753
	96	0.14886	0.61546	1.1968	3.3358	21.977	0.0012924	0.11356	0.42853	1.6007	25.891	0.19269	0.67157	1.6892	4.9128	23.899	0	1.514	2.9457	4.4514	14.638			96	0.53789	2.2764	4.0651	9.0729	22.43	0.0064591	0.13884	0.64116	1.9518	26.208	0.37466	1.0823	1.8678	5.5216	24.37	0	12.061	15.547	22.292	47.982
	97	1.0217	2.0262	5.0329	16.621	77.812	0.19229	0.4017	2.8243	19.323	93.324	0.84092	2.798	4.7829	17.346	68.933	0.046264	4.6472	7.3656	13.938	40.357			97	1.5927	3.6221	6.8484	17.6	77.788	0.19229	0.61615	3.0213	19.474	93.338	1.0433	3.2646	5.2441	18.152	68.977	0.20408	16.966	20.317	30.449	61.885
	98	2.8979	9.307	26.853	61.315	97.437	0.76273	6.1605	30.237	70.68	99.792	3.6463	13.28	22.48	60.663	96.756	1.2029	13.98	20.679	37.056	87.442			98	4.6641	11.47	31.371	63.82	97.37	0.83508	6.2283	30.409	70.748	99.793	3.8468	13.928	22.836	60.815	96.745	2.2313	27.455	34.767	45.36	87.397
	99	11.791	38.058	81.148	90.516	99.758	4.7671	34.418	91.407	97.738	100	15.644	47.667	77.651	92.744	99.598	5.0428	36.88	52.754	82.303	99.315			99	13.548	38.855	82.745	90.617	99.761	5.4057	34.436	91.428	97.712	100	16.31	47.94	77.775	92.817	99.6	9.1338	49.895	63.424	82.725	99.366
	100	100	100	100	100	100	100	100	100	100	100	100	100	100	100	100	100	100	100	100	100			100	100	100	100	100	100	100	100	100	100	100	100	100	100	100	100	100	100	100	100	100
6 Months	80	0	0	0.00035956	0.0012996	0.45979	0	0	0	0	0.13976	0	0	0	0	0.59798	0	0	0	0.0049377	1.4181		6 Months	80	0	0.0069019	0.052469	0.22639	0.67358	0	0	0.020563	0.035273	0.34226	0	0	0	0.001176	1.4089	0	0.005121	0.22096	1.1446	2.7658
	81	0	0	0.00036482	0.0043224	0.5229	0	0	0	0.00031559	0.15934	0	0	0	0	0.64523	0	0	0	0.0049377	1.7876			81	0	0.015347	0.066307	0.29916	0.74632	0	0	0.020563	0.035522	0.3448	0	0	0	0.0012416	1.47	0	0.0066294	0.30995	1.4148	3.3325
	82	0	0	0.00083115	0.038608	0.56183	0	0	0	0.00045583	0.18694	0	0	0	0.00089523	0.66795	0	0	0	0.0088633	1.9678			82	0.00045492	0.022321	0.13474	0.367	0.96989	0	0.00022801	0.020563	0.035522	0.36579	0	0	0	0.028093	1.4917	0	0.0066294	0.31684	1.5896	4.4375
	83	0	6.9077e-05	0.00087499	0.051294	0.58027	0	0	0	0.00045583	0.18961	0	0	0	0.00089523	0.68976	0	0	0.0017596	0.17219	2.0509			83	0.00045492	0.022416	0.18379	0.42397	1.358	0	0.00022801	0.020563	0.035522	0.38552	0	0	0	0.031638	1.5094	0	0.0066294	0.63596	1.8112	6.0521
	84	0	0.0002885	0.0045082	0.13314	0.59666	0	0	0	0.00053281	0.19139	0	0	0	0.0055501	0.70612	0	0	0.0017596	0.77384	2.1433			84	0.00045492	0.040263	0.22021	0.51659	1.716	0	0.00069702	0.023463	0.035522	0.40396	0	0	0.00073372	0.034151	1.533	0	0.0066294	0.64391	2.2098	7.6458
	85	0	0.00030228	0.008265	0.14654	0.6192	0	0	0	0.00060919	0.2083	0	0	0	0.017424	0.73338	0	0	0.0017596	0.85541	2.2717			85	0.00045492	0.045832	0.27337	0.57897	2.0629	0	0.00094467	0.025429	0.036148	0.4116	0	0	0.0011936	0.037406	1.5675	0	0.055193	0.6664	2.6588	9.1907
	86	0	0.00033369	0.011154	0.17125	0.64502	0	0	0	0.00068108	0.22966	0	0	0	0.034674	0.7661	0	0	0.0017596	0.92031	2.8514			86	0.00045492	0.052933	0.28856	0.68099	2.2884	0	0.00094467	0.026992	0.036549	0.41414	0	0	0.0073372	0.050122	1.5912	0	0.25049	0.71794	3.2505	10.717
	87	0	0.00084211	0.016154	0.1922	0.68149	0	0	0	0.00068108	0.25459	0	0	0.010736	0.040599	0.8179	0	0	0.0052045	1.0444	3.1658			87	0.00045492	0.055288	0.33377	0.79404	2.5886	0	0.00094467	0.030711	0.036888	0.43386	0	0.00022356	0.025641	0.085409	1.6069	0	0.41611	0.93805	3.4244	12.521
	88	0	0.0021069	0.022916	0.21002	0.75812	0	0	0	0.00083118	0.35518	0	0	0.017939	0.066562	0.88424	0	0	0.0099409	1.1328	3.722			88	0.00045492	0.066732	0.37105	0.85228	2.9628	0	0.0019148	0.034284	0.047825	0.4504	0	0.001637	0.044023	0.11252	1.7064	0	0.49987	1.0986	3.7743	14.3
	89	0	0.0061479	0.028638	0.23235	0.89746	0	0	0	0.00083118	0.39078	0	0	0.027806	0.067739	0.92241	0	0	0.0099409	1.3109	4.4514			89	0.00045492	0.087229	0.39857	0.92838	3.2913	0	0.0045583	0.034284	0.063426	0.47585	0	0.0052016	0.05783	0.12906	1.733	0	0.67621	2.0113	4.4512	15.82
	90	0	0.011726	0.035129	0.24567	1.082	0	0	0	0.0024325	0.45132	0	0.00028032	0.043439	0.082336	1.0124	0	0	0.0099409	1.5475	5.3798			90	0.00045492	0.10477	0.40341	1.0512	3.7163	0	0.0065193	0.034284	0.068509	0.48285	0	0.016542	0.067676	0.19626	1.7646	0	0.73429	2.3161	5.2447	17.887
27	91	0	0.019134	0.051774	0.25955	1.2837	0	0	0	0.012039	0.55992	0	0.0011394	0.078321	0.1325	1.1069	0	0	0.0099409	1.7205	6.1135		27	91	0.0090983	0.15418	0.46561	1.1444	3.9027	0	0.023161	0.03624	0.081998	0.53587	0	0.038136	0.10476	0.29121	2	0	0.8011	2.6759	5.9108	18.764
	92	0	0.031208	0.093486	0.31303	1.691	0	0	0.0006973	0.019952	0.7157	0	0.004299	0.12035	0.25106	1.2378	0	0.0019129	0.033785	1.7366	7.7905			92	0.013647	0.21141	0.59398	1.2833	4.0294	0	0.02656	0.053021	0.1044	0.68496	0	0.057026	0.1881	0.39862	2.1409	0	0.92798	2.8073	6.6739	19.262
	93	0	0.061621	0.13895	0.38777	1.9675	0	0	0.0074225	0.038468	0.82519	0	0.057113	0.19653	0.40146	1.4204	0	0.0023739	0.056308	1.9028	9.6173			93	0.036848	0.28882	0.76206	1.4332	4.2658	0	0.03389	0.065645	0.17553	0.78975	0	0.12156	0.29781	0.56852	2.2562	0	1.0759	3.0673	7.2776	20.043
	94	0.0049869	0.11077	0.2085	0.59587	2.3638	0	0.00074193	0.020918	0.069483	2.9555	0.0011213	0.083441	0.29526	0.66048	1.9362	0	0.062227	0.31241	2.2416	12.118			94	0.067782	0.48036	1.1629	1.8737	4.7101	0	0.043827	0.13673	0.28499	3.4314	0.01313	0.18878	0.55099	0.84917	2.4335	0	1.2951	3.4047	7.6609	21.2
	95	0.013714	0.25689	0.4432	1.4833	7.191	0	0.026195	0.10535	0.21619	9.3754	0.038197	0.17052	0.55378	1.3398	7.2573	0.0023728	0.44454	1.2275	2.7781	14.956			95	0.17332	0.7409	1.412	2.8964	7.4738	0	0.15337	0.25311	0.5973	9.864	0.038197	0.394	0.91204	1.6988	7.3193	0.0047443	2.2155	3.9755	9.4985	22.783
	96	0.033662	0.75428	1.5419	3.0041	15.673	0	0.28207	0.48958	1.5476	17.701	0.060876	0.74916	2.2889	4.4937	17.547	0.0023728	1.2995	3.1569	6.3611	21.481			96	0.19363	1.7367	2.6799	4.4188	15.977	0	0.3602	0.65745	1.9534	18.18	0.060876	0.90598	2.4931	5.1361	17.65	0.0047443	3.8717	6.7688	12.475	25.607
	97	0.53401	3.0053	11.337	16.226	64.857	0.26916	1.6093	9.0792	15.704	75.738	0.19218	3.6485	8.9094	16.229	62.021	1.0248	5.9917	9.7895	15.629	40.335			97	0.69285	3.9723	11.884	17.957	65.081	0.38357	1.7073	9.8319	16.158	75.859	0.19218	3.7331	9.8252	17.286	62.092	1.8621	10.658	15.679	24.562	41.156
	98	5.1146	23.891	49.395	66.714	93.826	2.3613	18.927	51.946	76.006	99.228	2.8409	26.385	44.548	66.561	95.334	4.5083	28.313	41.258	52.21	82.234			98	5.1045	24.492	51.552	66.787	93.863	2.4103	18.996	52.035	76.045	99.232	2.8409	26.718	44.841	66.624	95.343	5.3478	37.344	46.071	53.965	82.219
	99	15.465	75.69	86.106	96.717	99.692	11.4	77.105	91.607	99.378	100	21.636	70.962	85.119	97.252	99.92	5.1965	70.775	83.725	91.029	98.789			99	14.89	76.221	86.516	96.714	99.668	10.979	77.135	91.574	99.325	100	21.4	71.04	85.15	97.218	99.92	7.1802	71.754	84.231	90.869	98.793
	100	100	100	100	100	100	100	100	100	100	100	100	100	100	100	100	100	100	100	100	100			100	100	100	100	100	100	100	100	100	100	100	100	100	100	100	100	100	100	100	100	100
12 Months	80	0	0	0.00056888	0.0040055	0.35079	0	0	0	0	0.084516	0	0	0	0	0.018427	0	0	0.0007616	0.0080671	2.1535		12 Months	80	0.00066232	0.0055441	0.033748	0.098731	4.3095	0	0	0.00087662	0.06122	2.8195	0	0	0.00069603	0.0097341	4.3815	0	0.007406	0.17857	1.1163	11.36
	81	0	0	0.00056888	0.0076104	0.6005	0	0	0	0.00052083	0.10883	0	0	0	0	0.10394	0	0	0.0020475	0.0083619	3.6864			81	0.00066232	0.0066131	0.040724	0.1267	4.4203	0	0	0.00087662	0.06122	2.9267	0	0	0.00069603	0.027735	4.6749	0	0.01185	0.34189	1.144	11.683
	82	0	0.00027263	0.0014266	0.012016	0.72301	0	0	0	0.00052083	0.14356	0	0	0	0.00096922	0.17921	0	0	0.0035716	0.031987	4.4384			82	0.00066232	0.017751	0.042345	0.14062	4.5278	0	0	0.0010383	0.06122	2.956	0	0	0.0026301	0.049887	4.9536	0	0.018908	0.38574	1.1995	12.258
	83	0	0.00027263	0.0014266	0.039395	0.86426	0	0	0	0.00052083	0.24313	0	0	0	0.00096922	0.1828	0	0	0.0035716	0.14336	5.3056			83	0.00066232	0.022353	0.06999	0.17243	4.6115	0	0	0.0010383	0.06122	2.9991	0	0	0.0026301	0.056437	5.2484	0	0.018908	0.43302	1.3922	12.632
	84	0	0.00027263	0.0014266	0.043627	0.99748	0	0	0	0.0005273	0.24429	0	0	0	0.00096922	0.29391	0	0	0.0035716	0.14336	6.1234			84	0.00066232	0.022353	0.08852	0.22684	4.6626	0	0	0.0011353	0.06122	3.033	0	0	0.0026301	0.075359	5.5754	0	0.020168	0.53426	1.5662	12.757
	85	0	0.00032046	0.0047573	0.066836	1.1247	0	0	0	0.0005273	0.24544	0	0	0	0.015896	0.32616	0	0	0.0035716	0.14336	6.9042			85	0.0007604	0.024024	0.10158	0.2981	4.772	0	0	0.0011353	0.06122	3.1475	0	0	0.0050699	0.075359	5.6531	0	0.025697	0.82259	2.0065	13.037
	86	0	0.00032046	0.0059564	0.08011	1.3041	0	0	0	0.0005273	0.24544	0	0	0	0.015896	0.36855	0	0	0.0035716	0.21998	8.0056			86	0.0007604	0.038993	0.11596	0.37946	4.8251	0	0	0.0016579	0.06122	3.1713	0	0	0.010096	0.084918	5.6919	0	0.025697	1.0176	2.9151	13.265
	87	0	0.00035228	0.0085157	0.10809	1.5799	0	0	0	0.00060858	0.24544	0	0	0	0.029514	0.4441	0	0	0.0035716	0.24222	9.6947			87	0.0007604	0.040297	0.14415	0.48192	4.8972	0	0	0.0016579	0.062495	3.2822	0	0	0.013822	0.17617	5.7013	0	0.08244	1.1973	3.6901	13.35
	88	0	0.00035739	0.011174	0.1146	1.9434	0	0	0	0.00070024	0.2466	0	0	0	0.042163	0.78136	0	0	0.0060719	0.26694	11.922			88	0.0007604	0.043961	0.17873	0.5355	4.9598	0	0	0.0016579	0.062495	3.3289	0	0	0.028291	0.26489	5.7067	0	0.10536	1.3297	4.4049	13.587
	89	0	0.00038054	0.02617	0.1446	2.1449	0	0	0	0.00070024	0.24776	0	0	0.00048461	0.078826	0.93907	0	0	0.0061414	0.34603	13.159			89	0.0007604	0.064177	0.22252	0.54912	5.0559	0	0	0.0016579	0.062495	3.405	0	0	0.059319	0.27742	5.8072	0	0.23384	1.4507	4.6461	13.907
	90	0	0.00038054	0.029106	0.20019	2.4348	0	0	0	0.0060858	0.24776	0	0	0.00048461	0.1048	1.3047	0	0	0.0061414	0.54583	14.84			90	0.0007604	0.071373	0.28104	0.57856	5.0927	0	0	0.0078943	0.062495	3.4316	0	0.0038681	0.067898	0.33583	5.8849	0	0.32492	1.5299	5.2144	14.772
26	91	0.00027263	0.0071798	0.03856	0.24149	2.8017	0	0	0.00025586	0.012499	0.24892	0	0	0.057562	0.11906	1.6667	0	0	0.0078892	0.68464	16.804		26	91	0.0007604	0.080424	0.34465	0.64317	5.1457	0	0.00067013	0.029469	0.077593	3.4737	0	0.04563	0.087589	0.39667	5.9211	0	0.39624	1.773	5.6063	16.927
	92	0.00027263	0.016394	0.057585	0.27369	3.1029	0	0	0.0032669	0.024952	0.25239	0	0	0.075654	0.18676	2.3956	0	0	0.013241	1.1419	18.304			92	0.0050008	0.11255	0.38547	0.81689	5.2255	0	0.0060165	0.036149	0.10825	3.5269	0	0.083527	0.14952	0.48184	5.9371	0	0.40417	2.0134	6.5923	18.89
	93	0.00054526	0.027094	0.09031	0.38941	3.4745	0	0	0.0083667	0.036515	0.34257	0	0.015607	0.11631	0.30453	5.2076	0	0	0.098411	1.5056	20.022			93	0.011435	0.15843	0.51041	1.0325	5.3149	0	0.0152	0.049554	0.30333	3.5791	0	0.12145	0.2355	0.54511	6.0423	0	0.6855	2.1798	7.2497	20.333
	94	0.0008179	0.058522	0.16898	0.62084	4.7489	0	0.0010063	0.033213	0.12044	2.2649	0	0.06306	0.20655	0.51526	13.458	0	0.014945	0.38763	2.8297	21.317			94	0.027755	0.28332	0.59002	1.383	6.272	0.0030186	0.036701	0.095534	0.43913	3.6377	0.027077	0.14526	0.44304	0.81023	14.774	0	1.1987	3.1001	7.8811	22.037
	95	0.003078	0.13439	0.29059	1.2235	19.076	0.00058949	0.026815	0.054868	0.27035	17.553	0	0.23716	0.435	0.97219	27.344	0	0.090939	1.4225	4.0536	25.003			95	0.062353	0.44308	0.96681	2.0952	20.523	0.037527	0.065046	0.18918	0.8221	17.779	0.092857	0.32645	0.74894	2.0228	28.781	0	1.7446	5.135	9.5958	25.789
	96	0.004104	0.52322	0.87042	3.855	50.64	0.002553	0.15052	0.33143	2.6605	54.657	0	0.69237	1.4426	2.2477	49.691	0	0.45777	3.6873	6.493	30.691			96	0.12267	0.96705	2.2746	4.6129	51.608	0.065046	0.33752	0.86163	2.9089	54.794	0.21429	0.97724	1.9266	3.4924	51.125	0	3.446	7.747	13.054	31.423
	97	0.11132	3.0215	7.4432	16.11	85.88	0.0051061	1.8133	7.7124	18.073	93.859	0.030812	3.6727	7.5973	17.433	78.392	0.43162	2.766	11.974	17.448	42.817			97	0.27214	5.0173	8.1264	16.36	86.142	0.068872	2.5452	7.7903	18.158	93.849	0.43333	3.7971	8.1454	17.588	79.065	0.55556	9.6051	17.162	21.395	50.071
	98	1.3825	25.057	43.133	74.201	96.473	0.51571	24.994	47.803	84.923	99.646	0.3112	22.671	37.666	67.815	96.23	2.2831	24.758	37.889	56.304	75.725			98	3.3989	28.416	43.388	74.19	96.547	0.58031	25.655	47.837	84.947	99.634	3.2286	23.124	37.685	67.788	96.347	4.4444	27.06	44.154	57.079	76.362
	99	20.774	75.031	91.726	97.238	99.326	20.694	79.516	96.548	99.717	99.994	7.9311	65.528	90.291	97.837	99.982	22.251	72.122	86.415	94.231	98.042			99	25.809	75.122	91.724	97.231	99.338	20.742	79.588	96.547	99.716	99.989	11.084	65.767	90.699	97.842	99.982	30.611	72.826	86.451	94.234	97.363
	100	100	100	100	100	100	100	100	100	100	100	100	100	100	100	100	100	100	100	100	100			100	100	100	100	100	100	100	100	100	100	100	100	100	100	100	100	100	100	100	100	100
24 Months	80	0	0	0.00036627	0.00081812	0.0038359	0	0	0	0.00055407	0.0012765	0	0	0	0.0013052	0.002571	0	0	0.0012428	0.0060743	0.046661		24 Months	80	0	0.0021213	0.036064	0.082652	1.7635	0	0.0013646	0.013046	0.048838	1.02	0	0	0.00059201	0.0046509	0.60028	0	0.0048249	0.042769	0.78696	11.864
	81	0	0	0.00042565	0.0010818	0.0038359	0	0	0	0.00055407	0.0012765	0	0	0	0.0013052	0.002571	0	0	0.003114	0.0074603	0.046661			81	0	0.0022238	0.036527	0.086177	2.0091	0	0.0013646	0.013506	0.052812	1.1951	0	0	0.001538	0.0050117	0.60189	0	0.0048249	0.042769	0.80873	11.864
	82	0	0	0.00042565	0.0013184	0.004824	0	0	0	0.00055407	0.0053041	0	0	0	0.0013052	0.0038027	0	0	0.003114	0.0075941	0.046661			82	0	0.0023851	0.037874	0.099518	2.3056	0	0.0014911	0.014186	0.055009	1.5267	0	0	0.0015811	0.0050117	0.60349	0	0.011399	0.04613	1.3965	11.91
	83	0	0	0.00042565	0.001449	0.020582	0	0	0	0.00055407	0.014144	0	0	0	0.0013052	0.058942	0	0	0.003114	0.0086741	0.046661			83	0	0.0037416	0.041574	0.10547	2.474	0	0.0014911	0.034033	0.055217	1.6456	0	0	0.0015811	0.0066302	0.60349	0	0.011399	0.048885	2.7844	12.237
	84	0	0	0.00042565	0.001449	0.024442	0	0	0	0.00055407	0.014586	0	0	0	0.0013052	0.079857	0	0	0.003114	0.0086741	0.051846			84	0	0.0088468	0.05661	0.10771	2.6152	0	0.0014911	0.036589	0.067827	1.7412	0	0	0.0015811	0.0066302	0.60349	0	0.011399	0.16887	3.0659	12.284
	85	0	0	0.00052707	0.0018471	0.03409	0	0	0	0.00079743	0.023869	0	0	0	0.0013052	0.096969	0	0	0.003114	0.0086741	0.051846			85	0	0.013196	0.060073	0.1155	2.7203	0	0.0014911	0.04251	0.077199	1.7974	0	0	0.0016463	0.0066302	0.60831	0	0.011399	0.27109	3.2861	12.377
	86	0	0	0.00052707	0.0018471	0.053385	0	0	0	0.00079743	0.045085	0	0	0	0.0013052	0.11979	0	0	0.003114	0.0086741	0.062142			86	0	0.015871	0.07484	0.13785	2.7926	0	0.0014911	0.04735	0.093844	1.8476	0	0	0.0016463	0.0066302	0.60991	0	0.011399	0.36806	3.4188	15.694
	87	0	0	0.00060731	0.0018471	0.068822	0	0	0	0.00079743	0.062323	0	0	0	0.0013052	0.1369	0	0	0.003114	0.0090345	0.062142			87	0	0.01886	0.078238	0.15202	2.9118	0	0.0014911	0.051715	0.10082	1.9157	0	0	0.0016463	0.0066302	0.60991	0	0.012775	0.36806	3.5301	17.048
	88	0	0.00036337	0.0011976	0.011078	0.083294	0	0	0	0.0011069	0.073374	0	0	0	0.0027107	0.17492	0	0	0.003114	0.0090345	0.15035			88	0	0.021667	0.093775	0.17032	2.9954	0	0.0016346	0.056327	0.10672	1.9701	0	0	0.0021578	0.01133	0.61152	0	0.012775	0.37788	5.3085	17.609
	89	0	0.00036337	0.0017263	0.015726	0.093585	0	0	0	0.0011069	0.08354	0	0	0	0.006106	0.19204	0	0	0.003114	0.0090345	0.31626			89	0	0.0237	0.10518	0.19125	3.0466	0	0.0016346	0.057168	0.11522	1.9946	0	0	0.0033372	0.025474	0.62275	0	0.012775	0.40472	6.0805	20.177
	90	0	0.0003662	0.0017263	0.024443	0.11449	0	0	0	0.0011069	0.11227	0	0	0.00059259	0.023854	0.19204	0	0	0.003114	0.0090345	0.41477			90	0	0.027296	0.13307	0.20751	3.1156	0	0.0018672	0.068422	0.13056	2.0191	0	0.00059201	0.0058392	0.070545	0.63559	0	0.012775	0.40472	6.3455	20.177
20	91	0	0.00067925	0.0045697	0.039624	0.12832	0	0	0.00023328	0.0011069	0.12686	0	0	0.0029471	0.056097	0.22008	0	0	0.003114	0.010575	0.41995		20	91	0.00034132	0.03336	0.15052	0.2658	3.2361	0	0.0018672	0.11064	0.15082	2.1147	0	0.0027605	0.025366	0.11861	0.64041	0	0.027579	0.57406	6.5315	20.224
	92	0	0.00082386	0.0088146	0.049303	0.18395	0	0	0.00023328	0.0014261	0.18918	0	0	0.015063	0.085582	0.22448	0	0	0.0062527	0.023609	0.50809			92	0.00034132	0.041402	0.15844	0.36191	3.3663	0	0.0018672	0.11745	0.18034	2.1918	0	0.0027605	0.060474	0.16747	0.66127	0	0.027579	0.66596	6.7719	20.224
	93	0	0.0044558	0.025943	0.080344	0.32128	0	0	0.00071571	0.031208	0.31294	0	0.00049739	0.036412	0.15169	0.92908	0	0	0.0090645	0.10818	1.3843			93	0.00034132	0.081015	0.18122	0.56659	3.5088	0	0.029899	0.14432	0.2474	2.2443	0	0.0066302	0.10252	0.2773	0.97912	0	0.051337	0.7312	7.082	20.691
	94	0	0.021601	0.060062	0.13327	1.1733	0	0	0.0014572	0.049853	0.92557	0	0.01639	0.11098	0.30109	3.7427	0	0.0015632	0.027785	0.44983	2.8182			94	0.025255	0.11944	0.28268	0.96022	3.6819	0	0.074704	0.16846	0.45294	2.2802	0	0.033457	0.21971	0.42005	3.8447	0	0.23937	1.431	7.5003	21.625
	95	0.012064	0.075672	0.16369	0.45183	3.0348	0.00043488	0.0076256	0.073534	0.2371	3.3272	0	0.054092	0.38645	0.80899	7.0382	0	0.021015	0.097744	0.73925	9.1996			95	0.050096	0.25998	0.54548	1.8371	3.8315	0.0056811	0.14464	0.25767	0.93539	3.8739	0.0065055	0.078519	0.53275	1.0077	7.2516	0.0064103	0.35992	1.942	9.4438	26.676
	96	0.038776	0.31307	0.66632	2.2875	23.761	0.00086976	0.12269	0.34965	1.9451	30.815	0.08212	0.22276	0.82278	3.1709	12.406	0	0.67453	1.4448	7.9234	42.428			96	0.12458	0.68044	1.1543	4.2204	23.845	0.12133	0.20988	0.52213	3.229	30.835	0.094322	0.29924	1.0419	3.2682	12.682	0.13462	1.665	3.9577	22.146	42.428
	97	0.26092	1.3037	3.1809	14.417	74.615	0.097009	0.7863	2.5819	13.184	86.123	0.34133	1.2756	3.0179	18.39	50.091	0	2.3705	5.7589	29.883	87.459			97	0.27203	1.7162	4.9642	14.688	74.65	0.2441	0.84773	2.9979	13.497	86.122	0.341	1.4423	3.6373	18.751	50.33	1.2372	4.1021	13.915	42.958	87.459
	98	0.85347	9.8606	30.063	61.418	95.408	0.6976	10.206	28.027	66.595	98.637	1.2385	7.7831	28.023	51.526	88.541	1.2977	12.227	35.334	72.376	97.783			98	0.869	11.196	30.834	61.573	95.417	0.71791	10.718	29.234	66.631	98.637	1.242	7.8655	28.411	51.639	88.605	5.1125	14.024	40.999	73.938	97.783
	99	10.297	70.841	89.408	96.11	99.81	9.6373	76.624	92.084	97.737	99.991	11.927	55.817	83.986	94.447	99.407	4.6949	49.968	87.69	97.366	100			99	10.316	71.192	89.424	96.115	99.811	9.6623	76.746	92.068	97.725	99.991	11.931	56.042	84.081	94.448	99.41	8.4802	66.908	88.04	97.399	100
	100	100	100	100	100	100	100	100	100	100	100	100	100	100	100	100	100	100	100	100	100			100	100	100	100	100	100	100	100	100	100	100	100	100	100	100	100	100	100	100	100	100
