# Supplementary material for: Nocturnal oxygen saturation profiles of healthy term infants
Source: HighWire-hosted journal article supplement (doi:10.1136/archdischild-2013-305708), 2014-07-25
Supplement: archdischild-2013-305708supp_SpO2_Summary_Statistics.xlsx [file archdischild-2013-305708supp_SpO2_Summary_Statistics.xlsx]

## Sheet: Sheet1
Manual artefact rejection												No manual artefact rejection
Infant Age	Analysis Variable	Median Values Across Population, Stratified by Sleep State										Infant Age	Analysis Variable	Median Values Across Population, Stratified by Sleep State
		All Median (Range)		non-Rem/QS Median (Range)		REM/AS Median (Range)		Wake Median (Range)						All Median (Range)		non-Rem/QS Median (Range)		REM/AS Median (Range)		Wake Median (Range)
2 Weeks	Duration (mins)	549.63	(396-1024)	153.88	(114-544)	203.75	(93-270)	156.01	(38-357)			2 Weeks	Duration (mins)	549.63	(396-1024)	153.88	(114-544)	203.75	(93-270)	156.01	(38-357)
	Artifact Free Duration (mins)	489.36	(334-629)	150.22	(112-219)	191.56	(92-258)	108.32	(7-222)				Artifact Free Duration (mins)	503.04	(343-635)	151.19	(113-220)	193.9	(93-266)	117.61	(15-231)
	SAT5 (%Hb)	95	(90-97)	96	(85-98)	95	(88-97)	95	(75-99)				SAT5 (%Hb)	95	(88-97)	96	(85-98)	95	(88-97)	92	(73-99)
29	SAT10 (%Hb)	96	(93-98)	97	(93-98)	96	(92-98)	96	(79-99)			29	SAT10 (%Hb)	96	(92-98)	97	(93-98)	96	(92-98)	96	(77-99)
	Median SpO2 (%Hb)	98	(95-100)	98	(95-100)	97.5	(95-100)	98.5	(96-100)				Median SpO2 (%Hb)	98	(95-100)	98	(95-100)	97.5	(95-100)	98	(96-100)
	Mean SpO2 (%Hb)	97.779	(95-99)	97.928	(95-99)	97.291	(95-99)	97.875	(94-100)				Mean SpO2 (%Hb)	97.573	(95-99)	97.913	(95-99)	97.237	(95-99)	97.591	(93-100)
3 months	Duration (mins)	534.52	(411-660)	249.52	(151-327)	189.5	(86-302)	75.5	(8-313)			3 months	Duration (mins)	534.52	(411-660)	249.52	(151-327)	189.5	(86-302)	75.5	(8-313)
	Artifact Free Duration (mins)	483.12	(351-620)	248.85	(149-327)	188.21	(72-301)	46.935	(7-137)				Artifact Free Duration (mins)	492.89	(391-621)	249.52	(149-327)	189.5	(73-302)	60.555	(8-169)
	SAT5 (%Hb)	97	(94-99)	98	(94-100)	98	(93-99)	97	(91-99)				SAT5 (%Hb)	97	(90-99)	98	(94-99)	97	(93-99)	85	(68-99)
26	SAT10 (%Hb)	98	(95-99)	98	(95-100)	98	(94-99)	98	(94-100)			26	SAT10 (%Hb)	98	(95-99)	98	(95-100)	98	(94-99)	91	(76-100)
	Median SpO2 (%Hb)	99	(97-100)	99	(97-100)	99	(97-100)	99	(98-100)				Median SpO2 (%Hb)	99	(97-100)	99	(97-100)	99	(97-100)	99	(97-100)
	Mean SpO2 (%Hb)	98.877	(97-100)	98.789	(97-100)	98.923	(97-100)	99.131	(98-100)				Mean SpO2 (%Hb)	98.512	(97-100)	98.735	(97-100)	98.916	(97-100)	97.337	(92-100)
6 months	Duration (mins)	498.55	(367-680)	270.55	(160-421)	147	(88-229)	91.5	(20-214)			6 months	Duration (mins)	498.55	(367-680)	270.55	(160-421)	147	(88-229)	91.5	(20-214)
	Artifact Free Duration (mins)	456.85	(350-610)	259.14	(159-396)	139.71	(83-226)	60.283	(14-161)				Artifact Free Duration (mins)	462.5	(351-654)	261.99	(160-397)	140	(83-227)	66.672	(14-179)
	SAT5 (%Hb)	97	(95-98)	97	(95-99)	97	(95-99)	97	(90-99)				SAT5 (%Hb)	97	(95-98)	97	(95-99)	97	(95-99)	96	(83-98)
27	SAT10 (%Hb)	97	(96-99)	98	(96-99)	98	(96-99)	98	(94-100)			27	SAT10 (%Hb)	97	(96-99)	98	(96-99)	98	(96-99)	97	(86-100)
	Median SpO2 (%Hb)	99	(97-100)	98	(97-100)	99	(97-100)	99	(98-100)				Median SpO2 (%Hb)	98	(97-100)	98	(97-100)	99	(97-100)	99	(98-100)
	Mean SpO2 (%Hb)	98.483	(97-100)	98.364	(97-100)	98.519	(97-100)	98.601	(97-99)				Mean SpO2 (%Hb)	98.302	(97-100)	98.348	(97-100)	98.486	(97-100)	98.193	(96-99)
12 Months	Duration (mins)	498.95	(259-744)	272.31	(131-532)	128.27	(47-216)	72	(3-251)			12 Months	Duration (mins)	498.95	(259-744)	272.31	(131-532)	128.27	(47-216)	72	(3-251)
	Artifact Free Duration (mins)	439.51	(205-611)	266.56	(118-354)	119.71	(47-214)	41.47	(3-130)				Artifact Free Duration (mins)	442.8	(205-612)	267.05	(119-355)	121.93	(47-216)	43.377	(3-132)
	SAT5 (%Hb)	97	(95-99)	97	(95-99)	97	(93-99)	97	(83-99)				SAT5 (%Hb)	97	(89-99)	97	(95-99)	97	(83-99)	95.5	(69-99)
26	SAT10 (%Hb)	98	(95-99)	98	(95-99)	98	(94-100)	97	(88-99)			26	SAT10 (%Hb)	98	(95-99)	98	(95-99)	98	(94-99)	97	(75-99)
	Median SpO2 (%Hb)	99	(96-100)	98.5	(96-100)	99	(97-100)	99	(98-100)				Median SpO2 (%Hb)	99	(96-100)	98.5	(96-100)	99	(96-100)	99	(97-100)
	Mean SpO2 (%Hb)	98.562	(96-100)	98.485	(96-100)	98.593	(96-100)	98.547	(96-100)				Mean SpO2 (%Hb)	98.357	(96-100)	98.353	(96-100)	98.509	(96-100)	98.158	(95-100)
24 Months	Duration (mins)	486.29	(323-658)	337.79	(240-512)	112.75	(41-188)	37.5	(0-155)			24 Months	Duration (mins)	486.29	(323-658)	337.79	(240-512)	112.75	(41-188)	37.5	(0-155)
	Artifact Free Duration (mins)	476.75	(216-580)	305.06	(178-383)	103.2	(38-188)	27.278	(0-134)				Artifact Free Duration (mins)	481.52	(220-582)	306.66	(181-385)	103.92	(38-188)	28.91	(0-138)
	SAT5 (%Hb)	98	(96-99)	98	(96-99)	98	(95-99)	97	(95-100)				SAT5 (%Hb)	97.5	(96-99)	98	(96-99)	98	(95-99)	97	(73-98)
20	SAT10 (%Hb)	98	(96-99)	98	(96-100)	98	(96-99)	98	(96-100)			20	SAT10 (%Hb)	98	(96-99)	98	(96-100)	98	(96-99)	97	(75-100)
	Median SpO2 (%Hb)	99	(97-100)	99	(97-100)	99	(97-100)	99	(97-100)				Median SpO2 (%Hb)	99	(97-100)	99	(97-100)	99	(97-100)	99	(97-100)
	Mean SpO2 (%Hb)	98.77	(97-100)	98.78	(97-100)	98.808	(97-100)	98.711	(97-100)				Mean SpO2 (%Hb)	98.65	(97-100)	98.718	(97-100)	98.792	(97-100)	97.918	(94-100)
